# Supplementary material
Source: Springer Nature journal article supplement (https://www.springermedizin.de/resource/supplementary/13048_2009_17_MOESM3_ESM.pdf/9664754)

**1****2**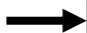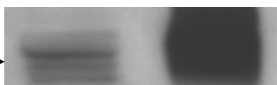**653F**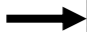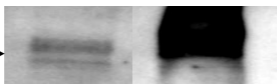**653B**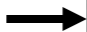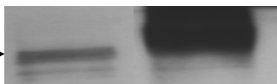**618F**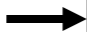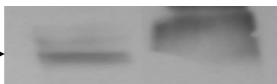**616E**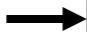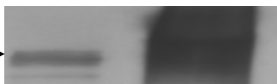**622D**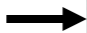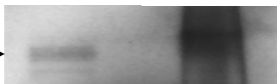**622C**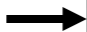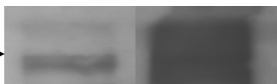**617C**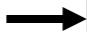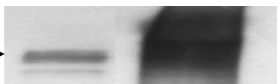**622B**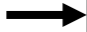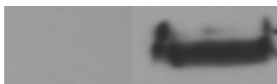**VK8**

Supplement: MOESM3 [file 9664754]
